# Supplementary material for: A Theoretical Study of Fe Adsorbed on Pure and Nonmetal (N, F, P, S, Cl)-Doped Ti3C2O2 for Electrocatalytic Nitrogen Reduction
Source: MDPI journal article supplement (doi:10.3390/nano12071081), 2022-03-25
Supplement: s1 [file s1]

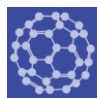

## Supporting Information

# A Theoretical Study of Fe Adsorbed on Pure and Nonmetal (N, F, P, S, Cl)-Doped $\text{Ti}_3\text{C}_2\text{O}_2$ for Electrocatalytic Nitrogen Reduction

Heng Luo <sup>1,2</sup>, Xiaoxu Wang <sup>3</sup>, Chubin Wan <sup>2,\*</sup>, Lu Xie <sup>1</sup>, Minhui Song <sup>1</sup> and Ping Qian <sup>1,2</sup>

<sup>1</sup> Beijing Advanced Innovation Center for Materials Genome Engineering, University of Science and Technology Beijing, Beijing 100083, China; s20190798@xs.ustb.edu.cn (H.L.); b20170555@xs.ustb.edu.cn (L.X.); s20191385@xs.ustb.edu.cn (M.S.); qianping@ustb.edu.cn (P.Q).

<sup>2</sup> Department of Physics, University of Science and Technology Beijing, Beijing 100083, China

<sup>3</sup> DP Technology, Beijing 100083, China; wangxx@dp.tech

\* Correspondence: cbwan@ustb.edu.cn

## Supporting Information:

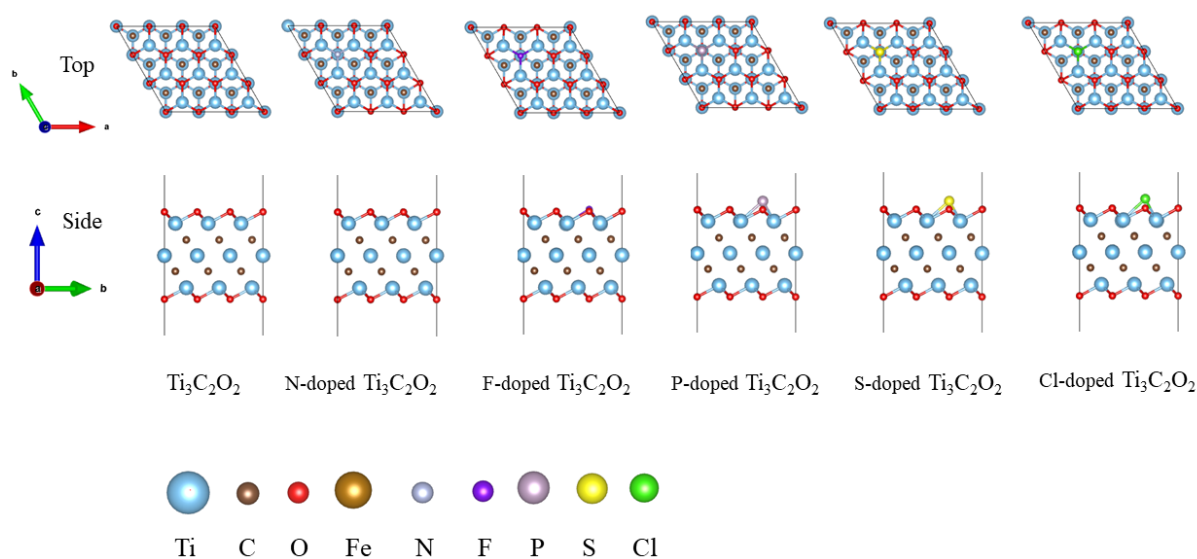

**Figure S1.** Top and side views of  $\text{Ti}_3\text{C}_2\text{O}_2$  and its nonmetal doped structure.

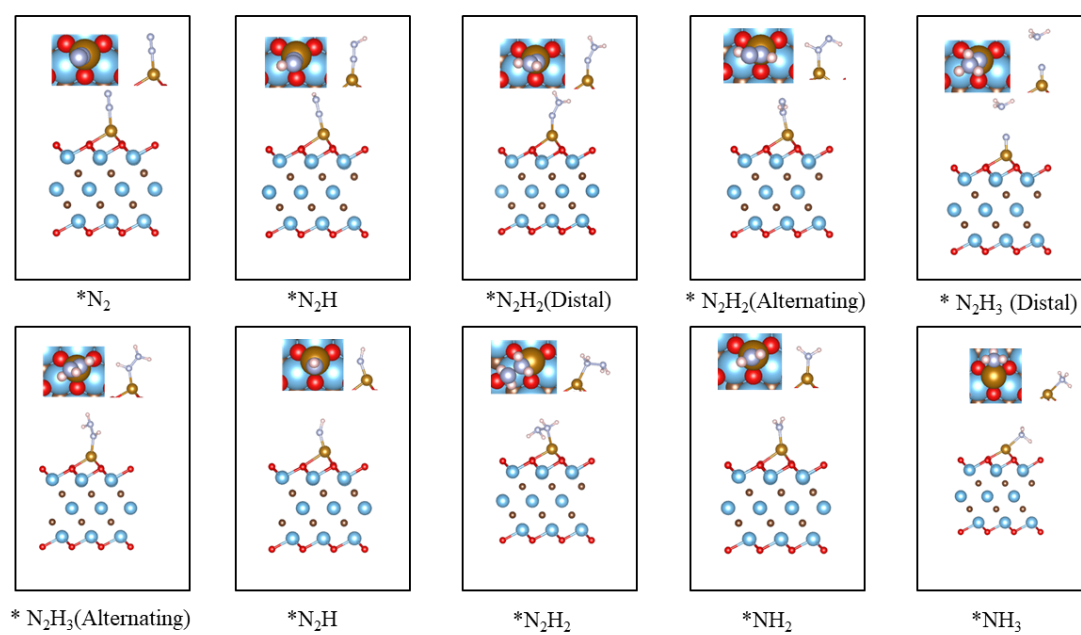

**Figure S2.** Optimized structures of all the possible elementary steps in NRR, taking Ti<sub>3</sub>C<sub>2</sub>O<sub>2</sub> as an example. Other nonmetal-doped Ti<sub>3</sub>C<sub>2</sub>O<sub>2</sub> show similar geometric structures.
